# Supplementary material for: Estimating the Number of Civilian Casualties in Modern Armed Conflicts–A Systematic Review
Source: Frontiers journal article supplement (doi:10.3389/fpubh.2021.765261), 2021-10-28
Supplement: Data_Sheet_1.pdf [file Data_Sheet_1.pdf]

## Instructions for completion:

Please refer to the attached dictionary for definition of terms and instructions for completing each section. For each criteria, score by placing a check mark in the appropriate box.

First Author: \_\_\_\_\_  
 Year: \_\_\_\_\_  
 Journal: \_\_\_\_\_  
 Reviewer: \_\_\_\_\_

| CRITERIA                                                                                                                                                                                                                                                                                                                                                                                                                                                                         | YES | NO |
|----------------------------------------------------------------------------------------------------------------------------------------------------------------------------------------------------------------------------------------------------------------------------------------------------------------------------------------------------------------------------------------------------------------------------------------------------------------------------------|-----|----|
| Q1. Did the authors have a clearly focused question [population, intervention (strategy), and outcome(s)]?                                                                                                                                                                                                                                                                                                                                                                       |     |    |
| Q2. Were appropriate inclusion criteria used to select primary studies?                                                                                                                                                                                                                                                                                                                                                                                                          |     |    |
| Q3. Did the authors describe a search strategy that was comprehensive?<br><br><i>Circle all strategies used:</i> <ul style="list-style-type: none"> <li>▪ health databases</li> <li>▪ psychological databases</li> <li>▪ social science databases</li> <li>▪ educational databases</li> <li>▪ other</li> <li>▪ handsearching</li> <li>▪ key informants</li> <li>▪ reference lists</li> <li>▪ unpublished</li> </ul>                                                              |     |    |
| Q4. Did search strategy cover an adequate number of years?                                                                                                                                                                                                                                                                                                                                                                                                                       |     |    |
| Q5. Did the authors describe the level of evidence in the primary studies included in the review?<br><br><ul style="list-style-type: none"> <li>▪ Level I → RCTs only</li> <li>▪ Level II → non-randomized, cohort, case-control</li> <li>▪ Level III → uncontrolled studies</li> </ul>                                                                                                                                                                                          |     |    |
| Q6. Did the review assess the methodological quality of the primary studies, including:<br><br><i>(Minimum requirement: 4/7 of the following)</i> <ul style="list-style-type: none"> <li>▪ Research design</li> <li>▪ Study sample</li> <li>▪ Participation rates</li> <li>▪ Sources of bias (confounders, respondent bias)</li> <li>▪ Data collection (measurement of independent/dependent variables)</li> <li>▪ Follow-up/attrition rates</li> <li>▪ Data analysis</li> </ul> |     |    |
| Q7. Are the results of the review transparent?                                                                                                                                                                                                                                                                                                                                                                                                                                   |     |    |
| Q8. Was it appropriate to combine the findings of results across studies?                                                                                                                                                                                                                                                                                                                                                                                                        |     |    |
| Q9. Were appropriate methods used for combining or comparing results across studies?                                                                                                                                                                                                                                                                                                                                                                                             |     |    |
| Q10. Do the data support the author's interpretation?                                                                                                                                                                                                                                                                                                                                                                                                                            |     |    |
| <b>TOTAL SCORE:</b>                                                                                                                                                                                                                                                                                                                                                                                                                                                              |     |    |

Quality Assessment  
Rating:

**Strong**  
(total score 8 – 10)

**Moderate**  
(total score 5 – 7)

**Weak**  
(total score 4 or less)
